# Supplementary figures and images for: Effects of the surface energy and surface stress on the phase stability of spin crossover nano-objects: a thermodynamic approach
Source: Royal Society of Chemistry journal article supplement (doi:10.1039/d4nr00477a), 2024-01-01

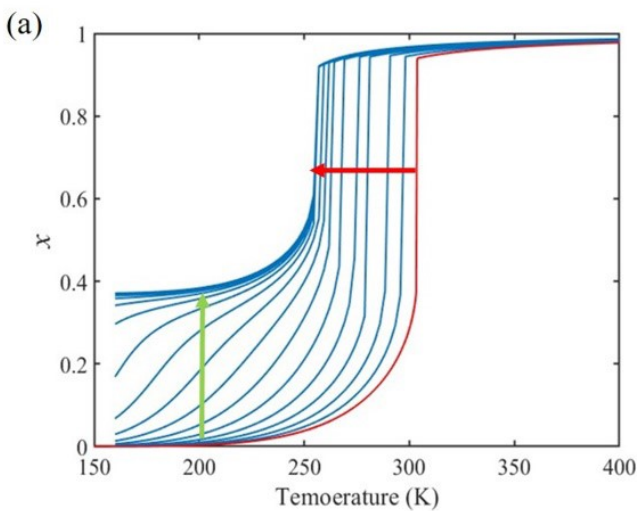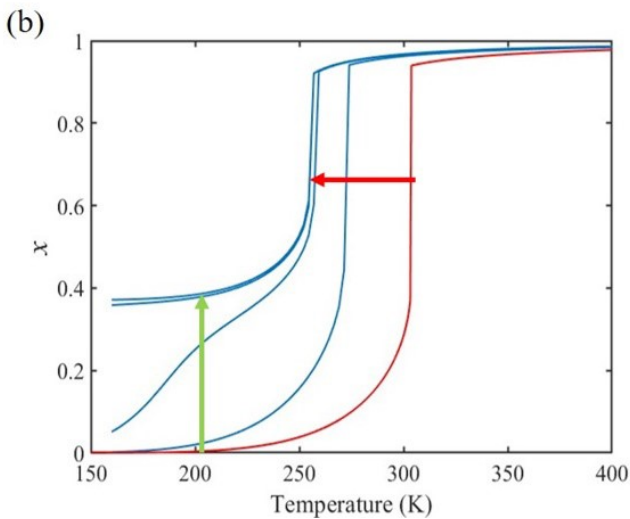

Supplement: d4nr00477a1.pdf [file d4nr00477a1.pdf]

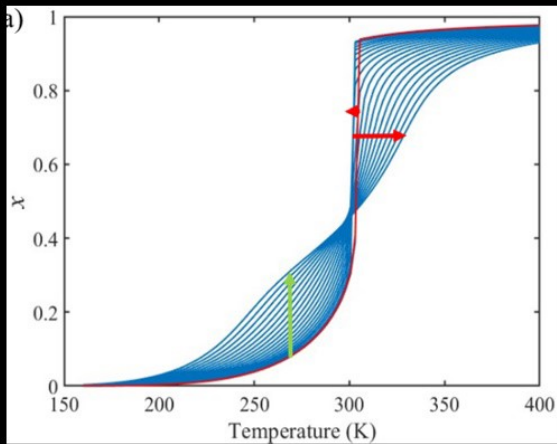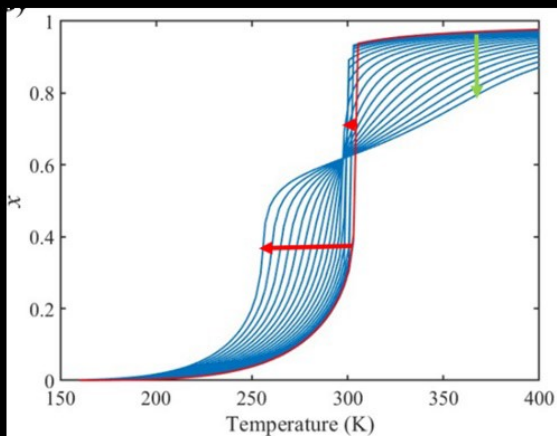

Supplement: d4nr00477a2.pdf [file d4nr00477a2.pdf]

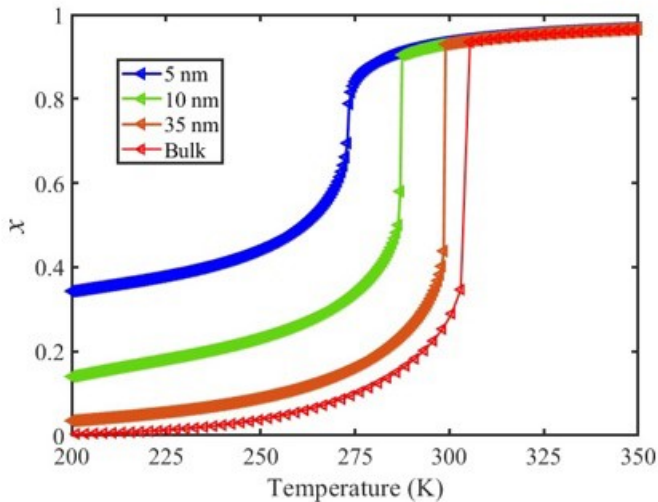

Supplement: d4nr00477a3.pdf [file d4nr00477a3.pdf]

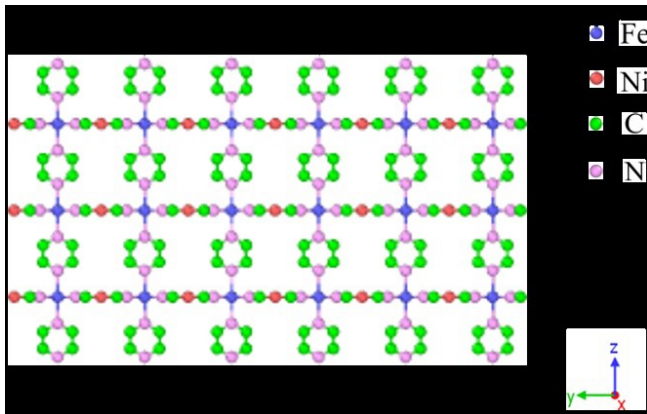

Supplement: d4nr00477a4.pdf [file d4nr00477a4.pdf]
